# Supplementary material for: SVJedi-graph: improving the genotyping of close and overlapping structural variants with long reads using a variation graph
Source: PubMed Central journal article supplement (PMC10311344; doi:10.1093/bioinformatics/btad237), 2023-06-30
Supplement: btad237_supplementary_data.pdf [file btad237_supplementary_data.pdf]

# SVJedi-graph: improving the genotyping of close and overlapping Structural Variants with long reads using a variation graph

## Supplementary material

Sandra Romain and Claire Lemaitre

### Contents

|          |                                            |          |
|----------|--------------------------------------------|----------|
| <b>1</b> | <b>Data accessibility</b>                  | <b>2</b> |
| 1.1      | Simulated deletion datasets . . . . .      | 2        |
| 1.2      | GIAB analyses . . . . .                    | 2        |
| <b>2</b> | <b>Tools command lines</b>                 | <b>2</b> |
| <b>3</b> | <b>SVJedi-graph results for inversions</b> | <b>4</b> |

# 1 Data accessibility

## 1.1 Simulated deletion datasets

Simulated reads and VCF files used for close and overlapping deletions as well as shifted break-point experiments are available for download at <https://data-access.cesgo.org/index.php/s/hAzETo82AUTePFB>

## 1.2 GIAB analyses

The **gold standard call set** for individual HG002, provided by Genome in a Bottle (GIAB) Consortium, is available at the following link:

- `ftp://ftp-trace.ncbi.nlm.nih.gov/giab/ftp/data/AshkenazimTrio/analysis/NIST_SVs_Integration_v0.6/HG002_SVs_Tier1_v0.6.vcf.gz`

The High confidence callset was extracted by selecting variants with the tag `PASS` in the `FILTER` field. The `ClusteredCalls` callset was extracted by selecting variants with the tag `ClusteredCalls` in the `FILTER` field.

We used the GRCh37.p13 human genome assembly as the reference genome to genotype both datasets, as it was the one used in the VCF and to identify the SVs.

### Sequencing datasets for GIAB HG002

- PacBio CLR: `ftp://ftp-trace.ncbi.nlm.nih.gov/ReferenceSamples/giab/data/AshkenazimTrio/HG002_NA24385_son/PacBio_MtSinai_NIST/`
- PacBio CCS (HiFi): `ftp://ftp-trace.ncbi.nlm.nih.gov/ReferenceSamples/giab/data/AshkenazimTrio/HG002_NA24385_son/PacBio_CCS_15kb/`
- ONT Promethion: `ftp://ftp-trace.ncbi.nlm.nih.gov/ReferenceSamples/giab/data/AshkenazimTrio/HG002_NA24385_son/UCSC_Ultralong_OxfordNanopore_Promethion/`

The PacBio CLR data of the individual HG002 has a sequencing depth of 63x. The sequence data were sub-sampled to a depth of 30x.

# 2 Tools command lines

### SVJedi:

```
#With PacBio CLR and CCS reads
svjedi.py -t 20 -r reference.fa \
  -v sv_set.vcf \
  -i reads.fq
```

```
#With ONT reads
svjedi.py -t 20 -r reference.fa \
  -v sv_set.vcf \
  -i reads.fq -d ont
```

### SVJedi-graph:

```
svjedi-graph.py -t 20 -r reference.fa \
  -v sv_set.vcf \
  -q reads.fq
```

## Minimap2:

```
#With PacBio CLR reads
minimap2 -ax map-pb -t $t reference.fa reads.fq --MD > minimap2_results.sam
#With PacBio CCS reads
minimap2 -ax asm20 -t $t reference.fa reads.fq --MD > minimap2_results.sam
#With ONT Promethion reads
minimap2 -ax map-ont -t $t reference.fa reads.fq --MD > minimap2_results.sam

samtools view -Sb -q 10 minimap2_results.sam > minimap2_results.bam
samtools sort -o minimap2_results.sorted.bam -O bam minimap2_results.bam
samtools index -b minimap2_results.sorted.bam
```

## Sniffles2:

```
#For mapping see Minimap2 commands

#Sniffles2 genotyping
sniffles --input minimap2_results.sorted.bam \
  --genotype-vcf sv_set.vcf \
  --vcf sv_genotype.vcf
```

## CuteSV:

```
#For mapping see Minimap2 commands

#CuteSV genotyping with PacBio CLR reads
cuteSV --max_cluster_bias_INS 100 \
  --diff_ratio_merging_INS 0.3 \
  --max_cluster_bias_DEL 200 \
  --diff_ratio_merging_DEL 0.5 \
  --threads $t -Ivcf sv_set.vcf \
  --max_size -1 \
  minimap2_results.sorted.bam reference.fa \
  sv_genotype.vcf ./

#CuteSV genotyping with PacBio CCS reads
cuteSV --max_cluster_bias_INS 1000 \
  --diff_ratio_merging_INS 0.9 \
  --max_cluster_bias_DEL 1000 \
  --diff_ratio_merging_DEL 0.5 \
  --threads $t -Ivcf sv_set.vcf \
  --max_size -1 \
  minimap2_results.sorted.bam reference.fa \
  sv_genotype.vcf ./

#CuteSV genotyping with ONT reads
cuteSV --max_cluster_bias_INS 100 \
  --diff_ratio_merging_INS 0.3 \
  --max_cluster_bias_DEL 100 \
  --diff_ratio_merging_DEL 0.3 \
  --threads $t -Ivcf sv_set.vcf \
```

```

--max_size -1 \
minimap2_results.sorted.bam reference.fa \
sv_genotype.vcf ./

```

### LRCaller:

#For mapping see Minimap2 commands

```

#LRcaller genotyping
lrcaller --gtm joint --fa reference.fa \
minimap2_results.sorted.bam sv_set.vcf \
sv_genotype.vcf

```

### 3 SVJedi-graph results for inversions

|       |     | Inversions               |     |     |     |
|-------|-----|--------------------------|-----|-----|-----|
|       |     | SVJedi-graph estimations |     |     |     |
|       |     | 0/0                      | 0/1 | 1/1 | ./. |
| Truth | 0/0 | 150                      | 0   | 0   | 0   |
|       | 0/1 | 0                        | 150 | 0   | 0   |
|       | 1/1 | 0                        | 2   | 148 | 0   |

Genotyping accuracy: 99.6 %

Genotyping rate: 100 %

Supplementary Table 1: Contingency tables of SVJedi-graph genotyping results on a 30x PacBio simulated dataset with 450 randomly simulated inversions. Inversions were randomly simulated on human chromosome 1, by sampling the first breakpoint location in a uniform distribution and choosing the inversion size uniformly between 50 bp and 15 kb. Grey labelled boxes correspond to correct estimation of the genotypes. The number of genotypes that SVJedi-graph fails to assess is indicated by the “./.” column.
